# Supplementary material for: The asymmetric geospace as displayed during the geomagnetic storm on 17 August 2001
Source: Copernicus journal article supplement (doi:10.5194/angeo-36-1577-2018), 2018-11-29
Supplement: Supplementary file 1 [file angeo-36-1577-2018-supplement.zip]

Archive with 2 entries (2 files):
- 2001-08-17-data_movie.mp4
- angeo-36-1577-2018-supplement-title-page.pdf
