# Supplementary material for: The asymmetric geospace as displayed during the geomagnetic storm on 17 August 2001
Source: Copernicus journal article supplement (doi:10.5194/angeo-36-1577-2018), 2018-11-29
Supplement: Supplementary file 1 [file angeo-36-1577-2018-supplement.zip › angeo-36-1577-2018-supplement-title-page.pdf]

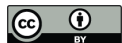

## *Supplement of*

# **The asymmetric geospace as displayed during the geomagnetic storm on 17 August 2001**

**N. Østgaard et al.**

*Correspondence to:* Nikolai Østgaard ([nikolai.ostgaard@uib.no](mailto:nikolai.ostgaard@uib.no))

- [angeo-36-1577-2018-supplement-title-page.pdf](#)
- [2001-08-17-data\\_movie.mp4](#)

The copyright of individual parts of the supplement might differ from the CC BY 4.0 License.
